# Supplementary material for: Diabetes mellitus is not a risk factor for osteoarthritis
Source: PubMed Central journal article supplement — RMD Open. 2020 Feb 13;6(1):e001030. doi: 10.1136/rmdopen-2019-001030 (PMC7046958; doi:10.1136/rmdopen-2019-001030), 2020-02-13
Supplement: rmdopen-2019-001030supp001.pdf [file rmdopen-2019-001030supp001.pdf]

Supplementary Figure 1. Funnel plots for main meta-analysis

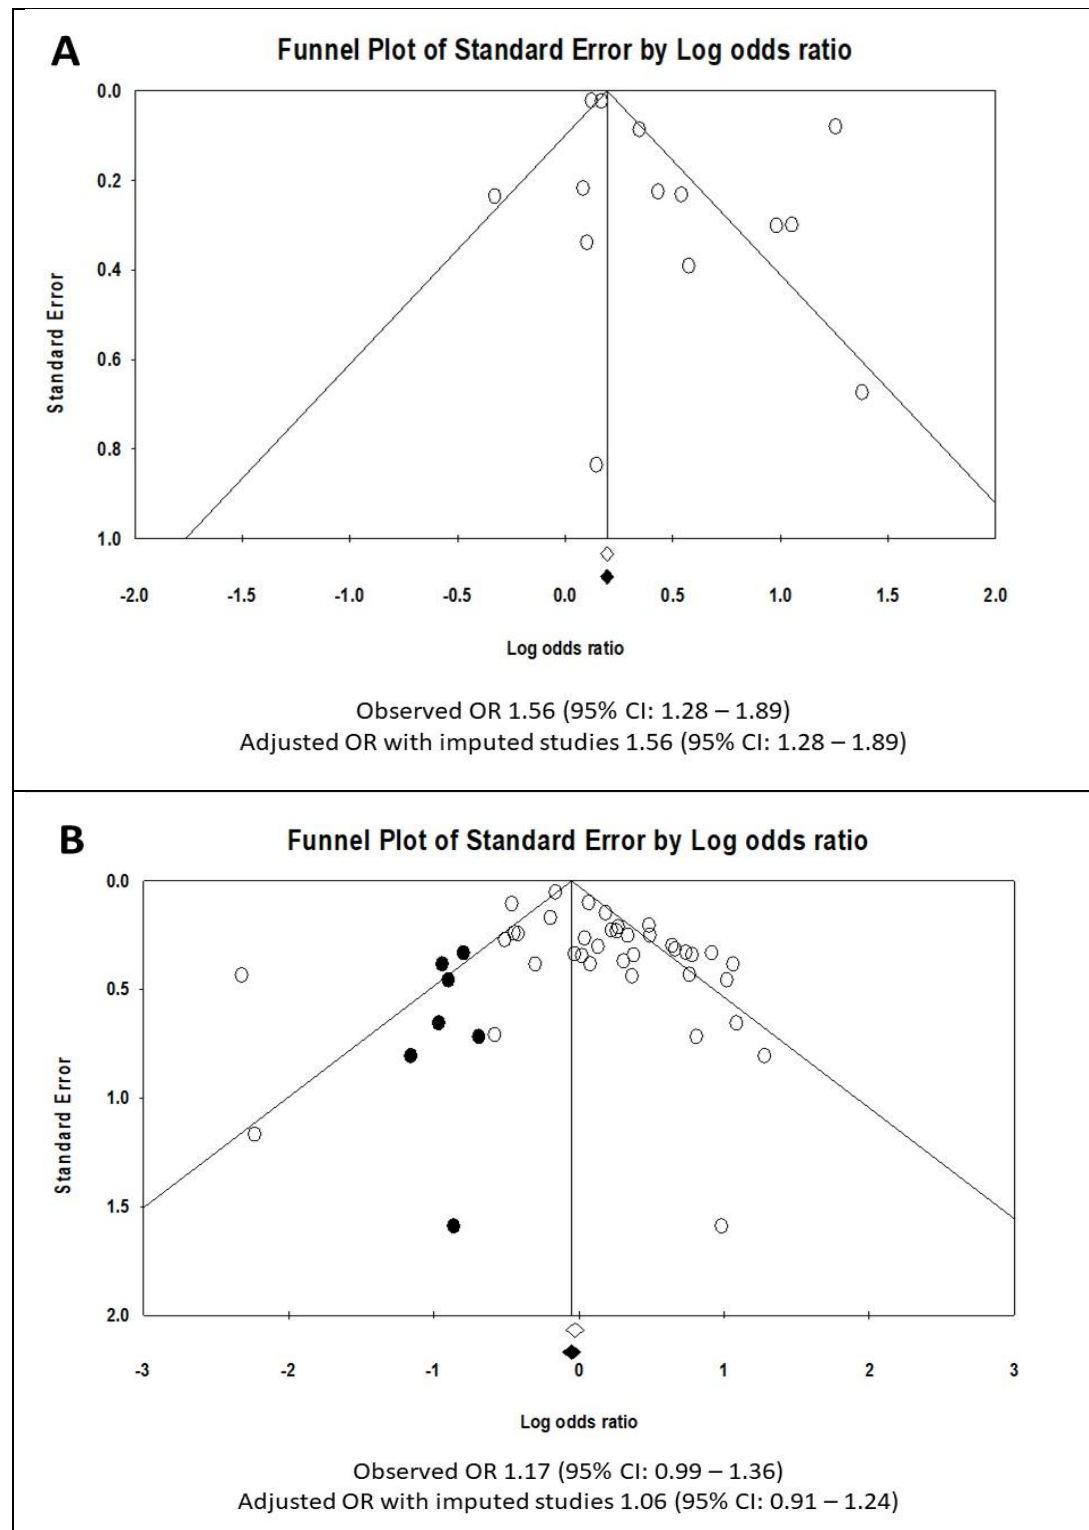

**A.** Funnel plot for model 1, risk of diabetes mellitus comparing subjects with to without osteoarthritis. **B.** Funnel plot for model 2, risk of osteoarthritis comparing subjects with to without diabetes mellitus. White: observed studies; Black: imputed studies adjusted for publication bias.

**Supplementary Figure 2. Forest plots for risk of OA comparing DM to non-DM, sensitivity analysis stratified by BMI compatibility**

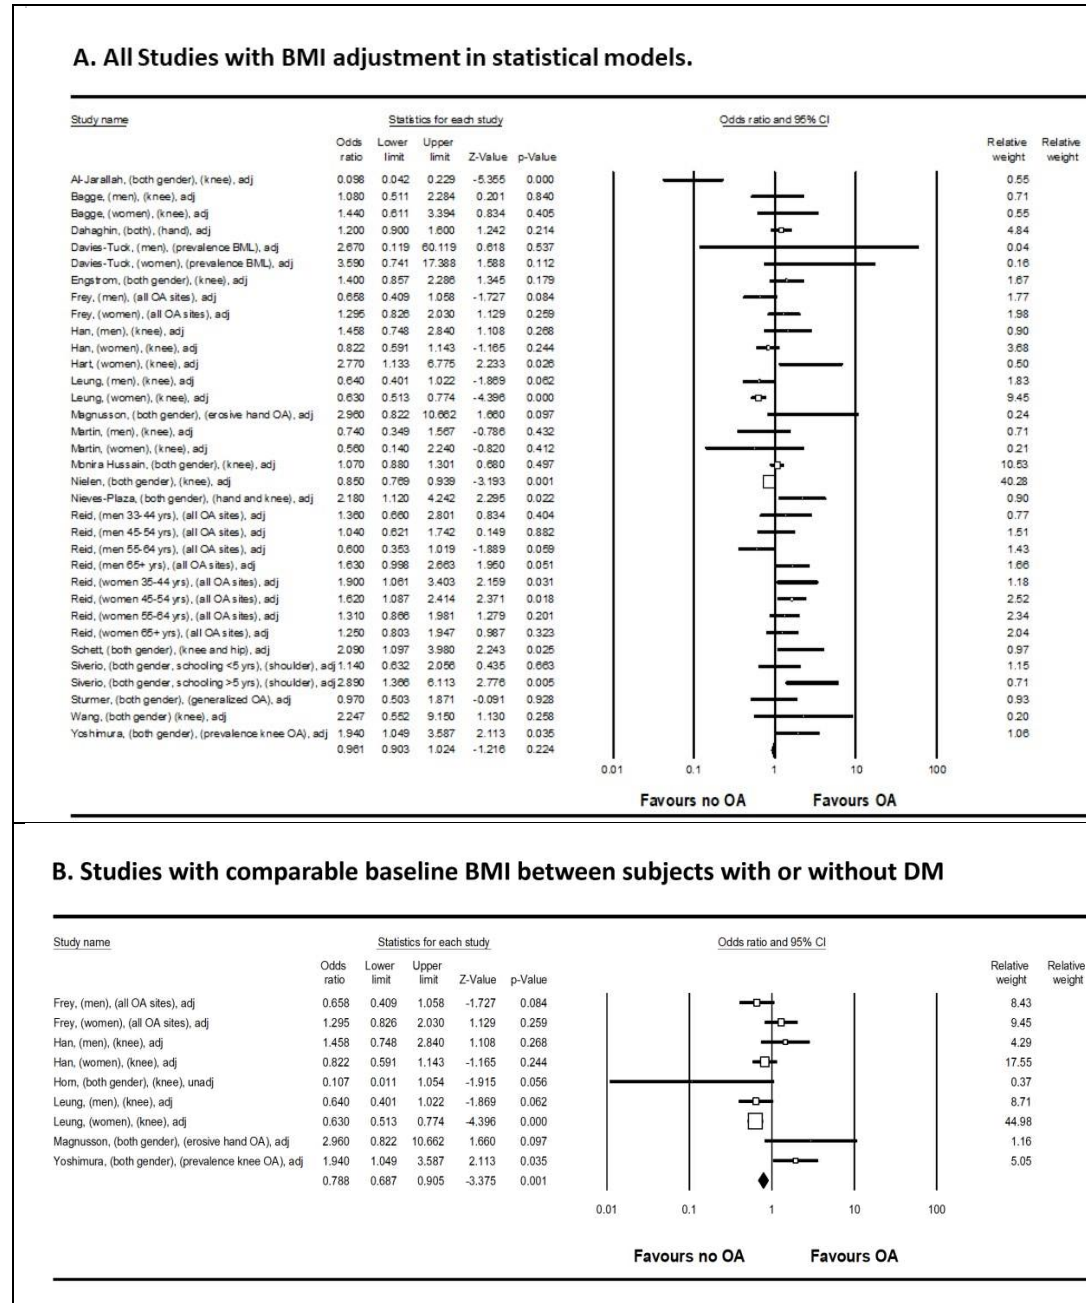

**Supplementary Figure 3. Forest plots for risk of OA comparing DM to non-DM, sensitivity analysis stratified by study design**

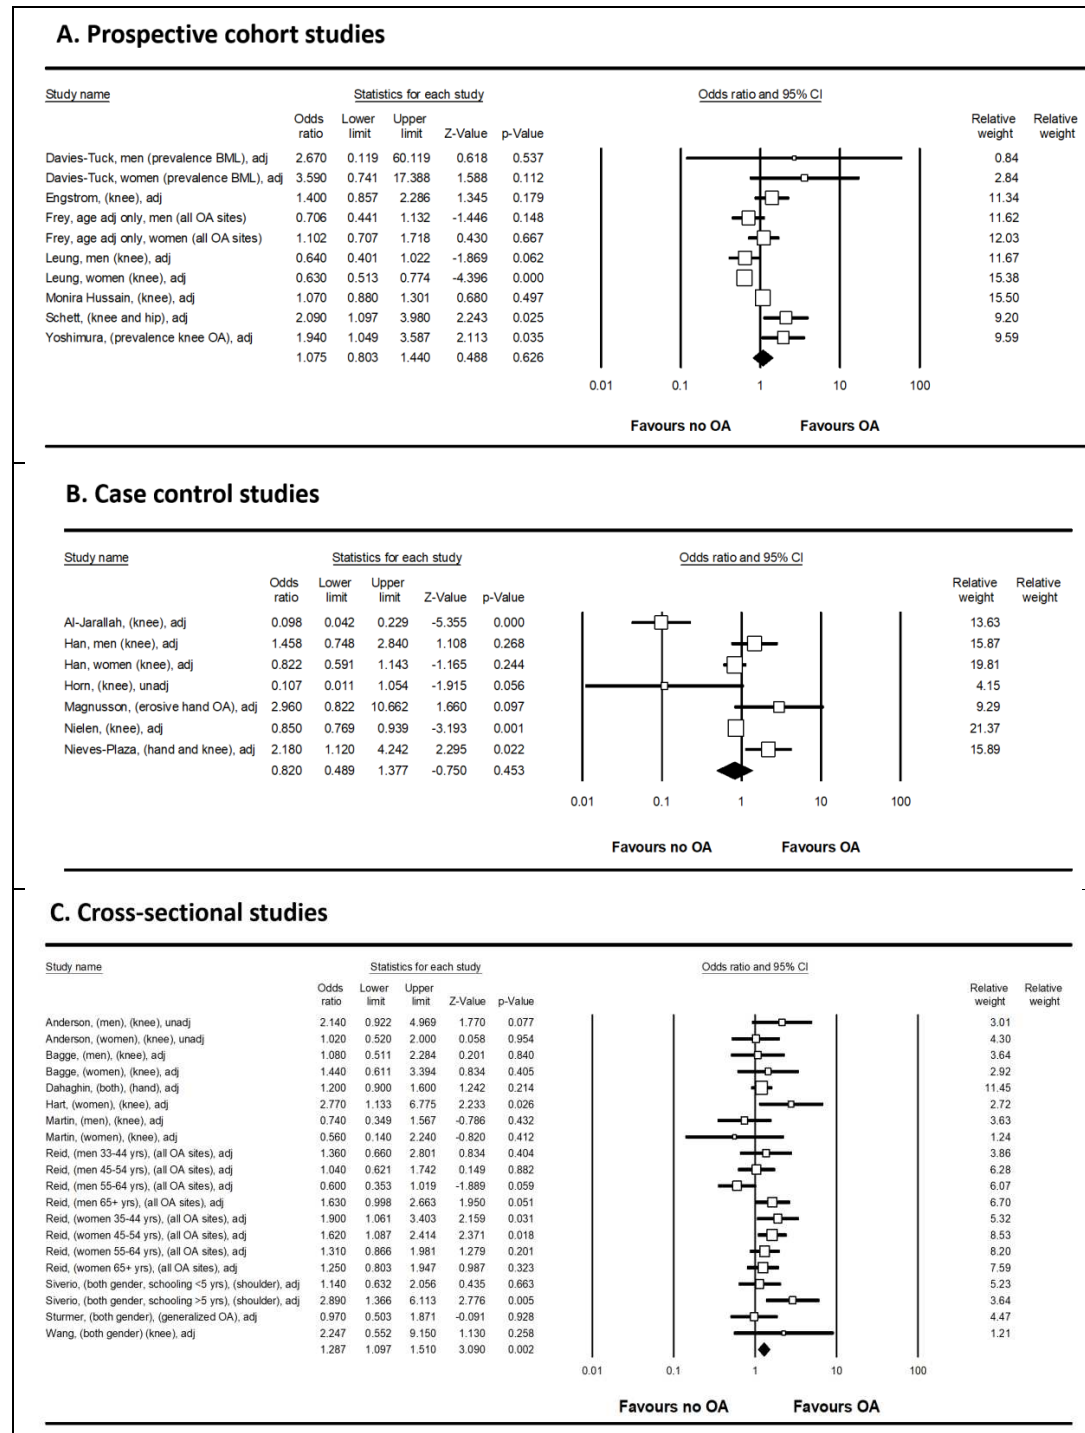

**Supplementary Figure 4. Forest plots for risk of OA comparing DM to non-DM, sensitivity analysis stratified by genders**

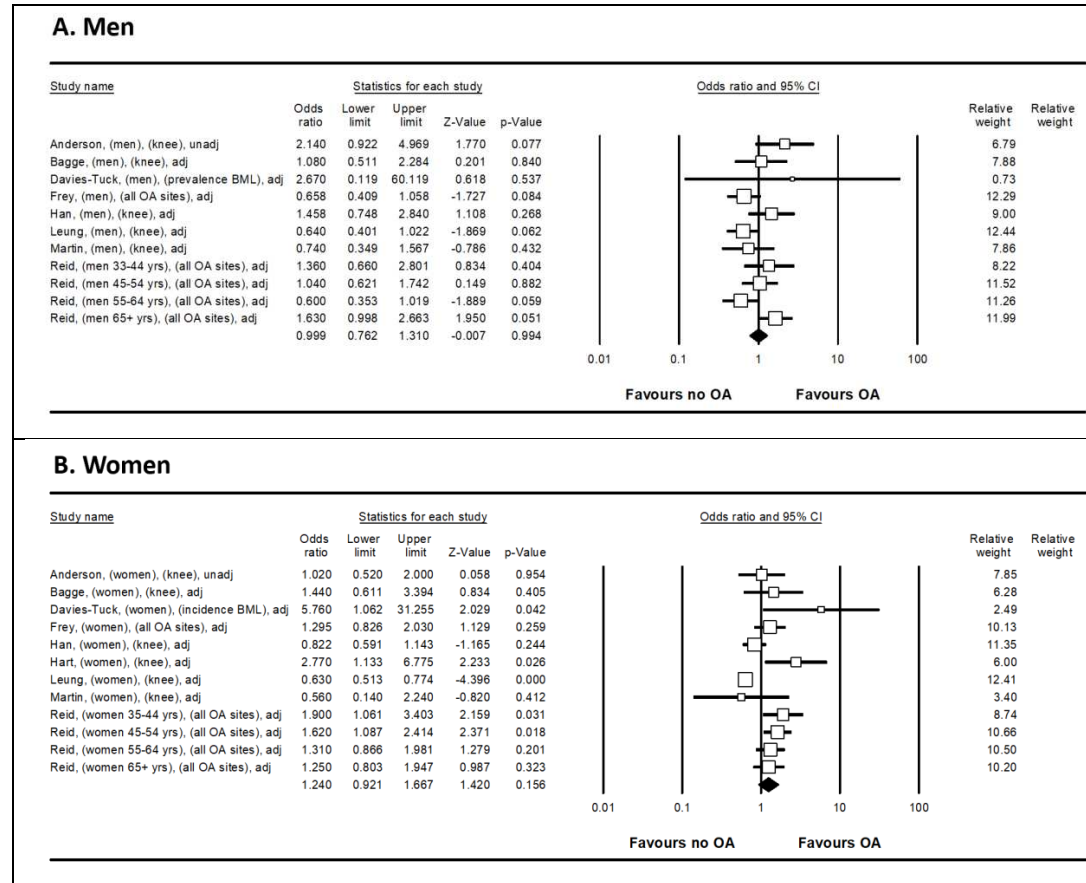

**Supplementary Figure 5. Forest plots for risk of OA comparing DM to non-DM, sensitivity analysis stratified by site of OA**

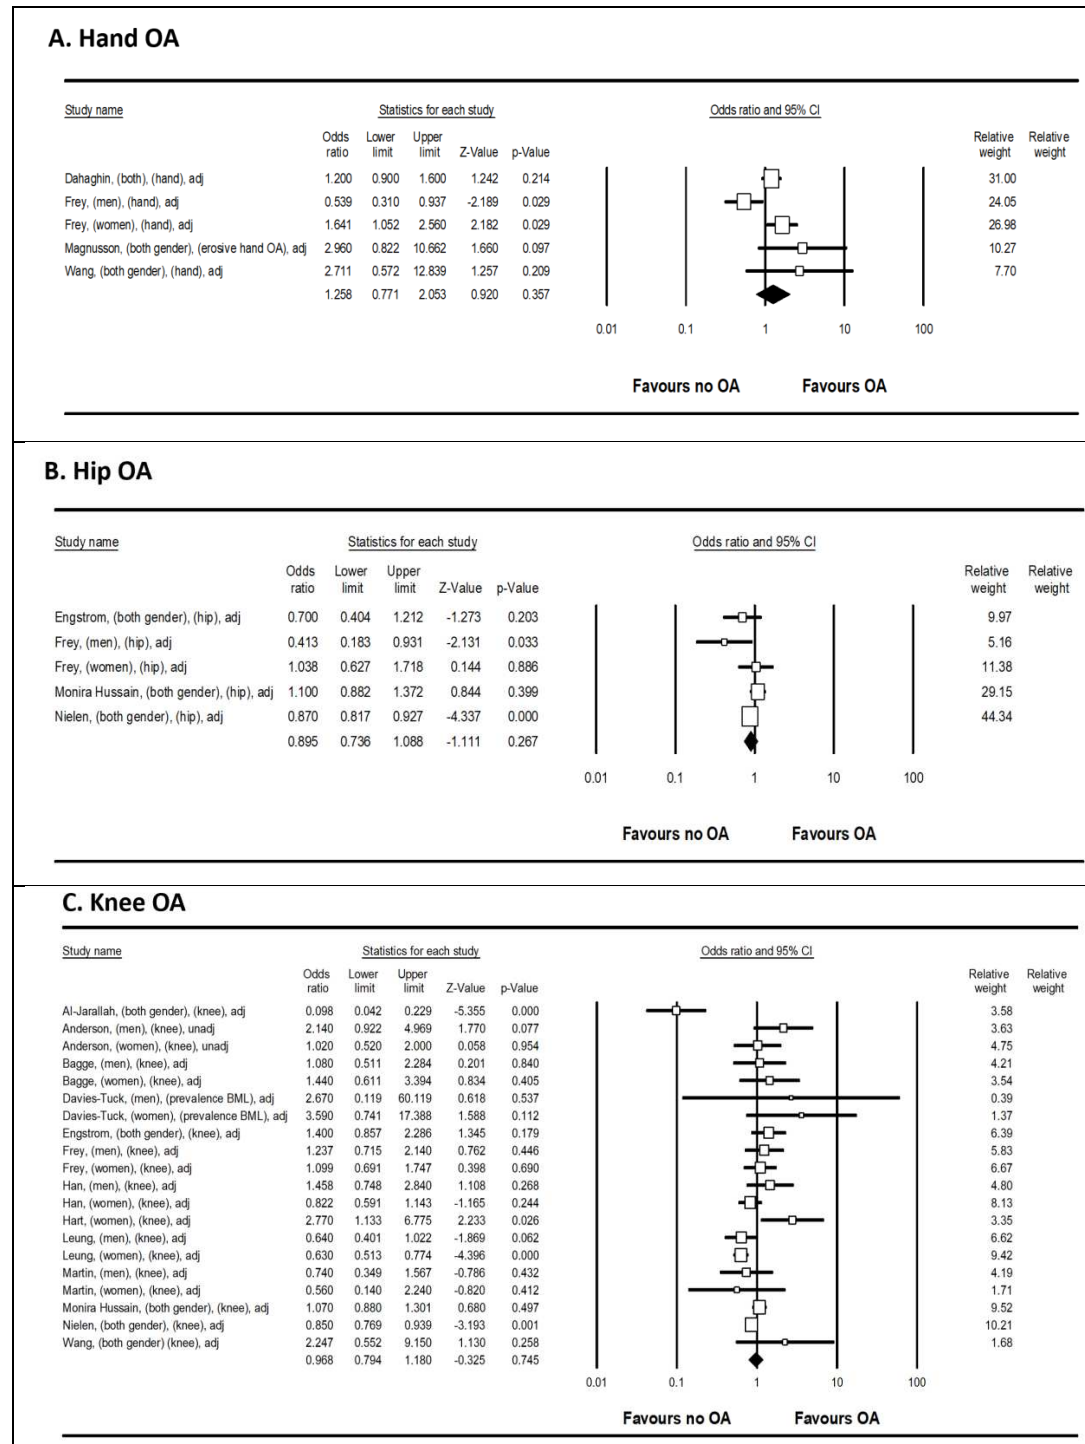

**Supplementary Figure 6. Funnel plots for sensitivity analysis stratified by BMI adjustment**

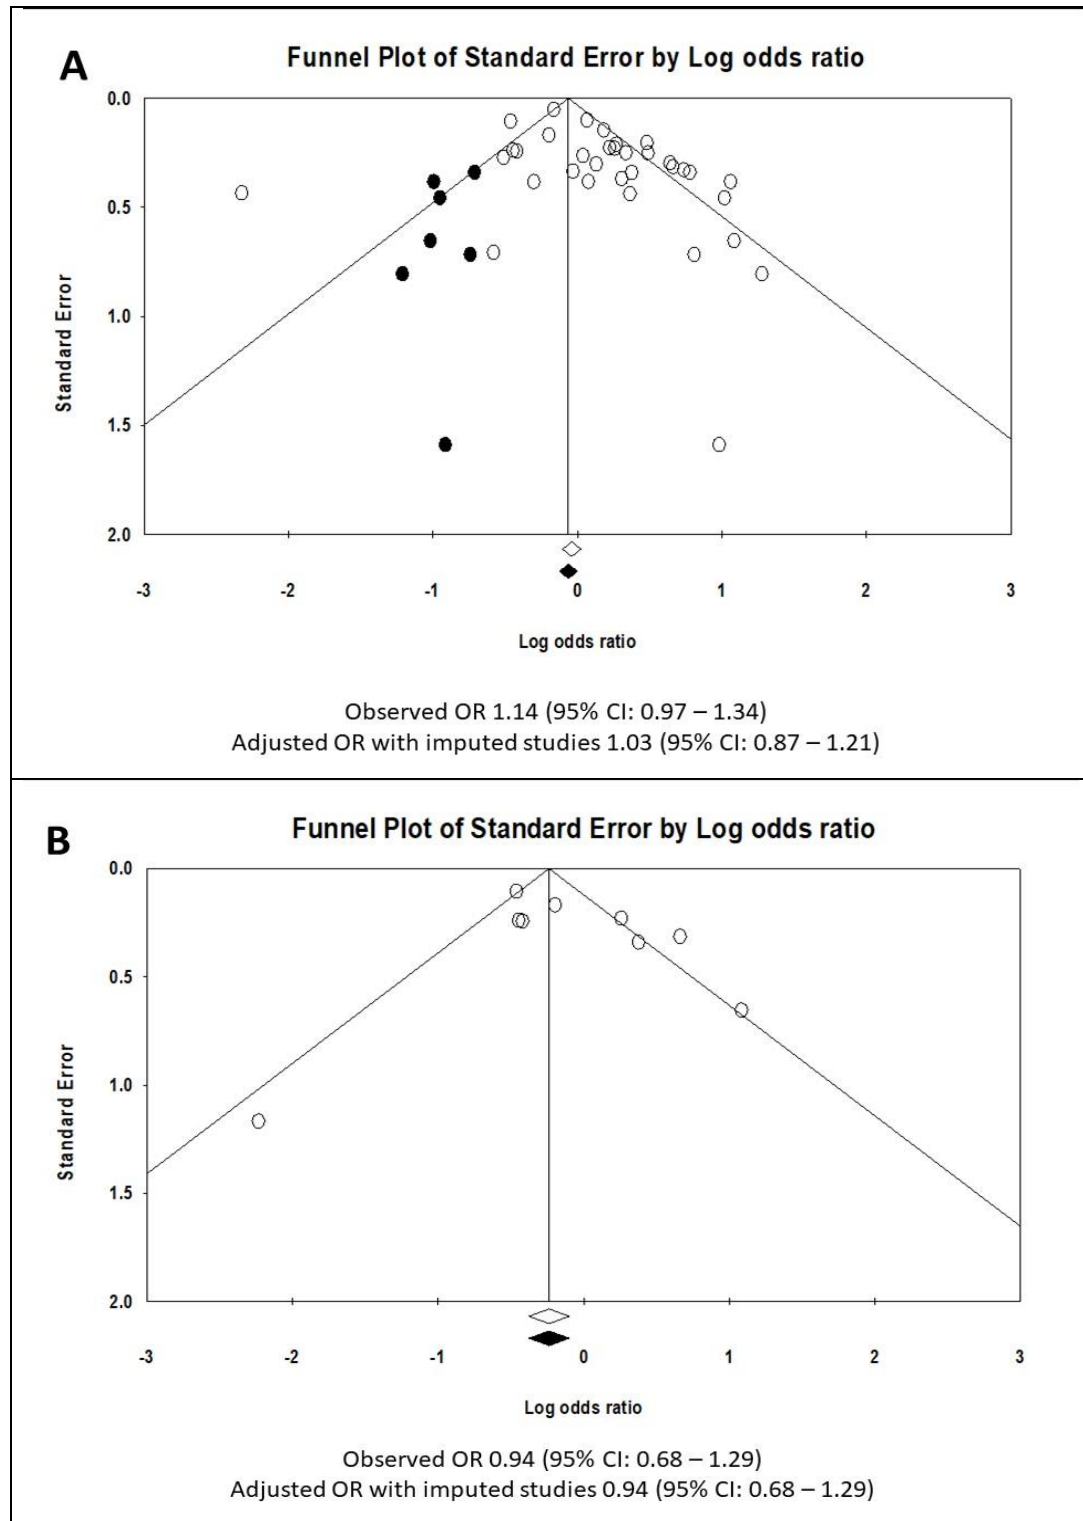

**A.** Funnel plot for studies with comparable baseline BMI between comparison groups. **B.** Funnel plot for studies with any form of adjustment of BMI.
